# Supplementary material for: Zinc hydroxide/oxide and zinc hydroxy stannate photocatalysts as potential scaffolds for environmental remediation
Source: Royal Society of Chemistry journal article supplement (doi:10.1039/c5nj00324e), 2015-01-01
Supplement: c5nj00324e1.pdf [file c5nj00324e1.pdf]

## SUPPLEMENTARY INFORMATION

### **Zinc hydroxide/oxide and Zinc Hydroxy Stannate photocatalysts as potential scaffold for environmental remediation**

Osmando F. Lopes\*<sup>1,2</sup>, Vagner R. de Mendonça<sup>2</sup>, Ahmad Umar<sup>3,4\*</sup>, Mohinder S.

Chuahan,<sup>5</sup> Ramesh Kumar,<sup>5</sup> Suvarcha Chauhan,<sup>5</sup> Caue Ribeiro<sup>2</sup>

<sup>1</sup> Department of Chemistry - Federal University of São Carlos, Rod. Washington Luiz,  
km 235, 13565-905, São Carlos-SP, Brazil.

<sup>2</sup> Embrapa Instrumentação, XV de Novembro, 1452, 13560-970, São Carlos-SP,  
Brazil.

<sup>3</sup> Promising Centre for Sensors and Electronic Devices, Najran University, P.O. Box  
1988, Najran, 11001, Kingdom of Saudi Arabia,

<sup>4</sup> Department of Chemistry, Faculty of Sciences and Arts, Najran University, Najran  
University, P.O. Box 1988, Najran, 11001, Kingdom of Saudi Arabia

<sup>5</sup> Department of Chemistry, Himachal Pradesh University, Shimla-5, Himachal  
Pradesh, 171005, India

To examine the chemical compositions and purity, the as-synthesized zinc based hydroxide/oxide nanostructures were further characterized by FTIR analysis. Figure S1 exhibits the typical FTIR spectra of as-synthesized zinc based hydroxide/oxide nanostructures (Zn-1, Zn-2 and Zn-3). All three samples exhibited well-defined absorption peaks. As can be seen in the spectra that all samples are exhibiting a broad band in the range of  $3600 - 2700\text{ cm}^{-1}$ , related with the adsorbed water and hydroxide ions. Interestingly, with increasing the reaction time and temperature, the intensity of this band was decreased due to the reduction of  $\text{OH}^-$  ions in the prepared samples. In addition to this, all the samples also show a sharp and strong band in the range of  $555\text{-}480\text{ cm}^{-1}$  which are related with the metal-oxygen (Zn-O) bond. The observed FTIR peaks are similar to the reported literature [27]. The peaks in the range of  $1500 - 1000\text{ cm}^{-1}$  can be assigned to C-N stretching and can be related to synthesis residues of ethylenediamine. The peaks intensities decrease with the increase in temperature and reaction time reaction, indicating the re-motion of residues in Zn-3 sample when compared with Zn-1 and Zn-2.

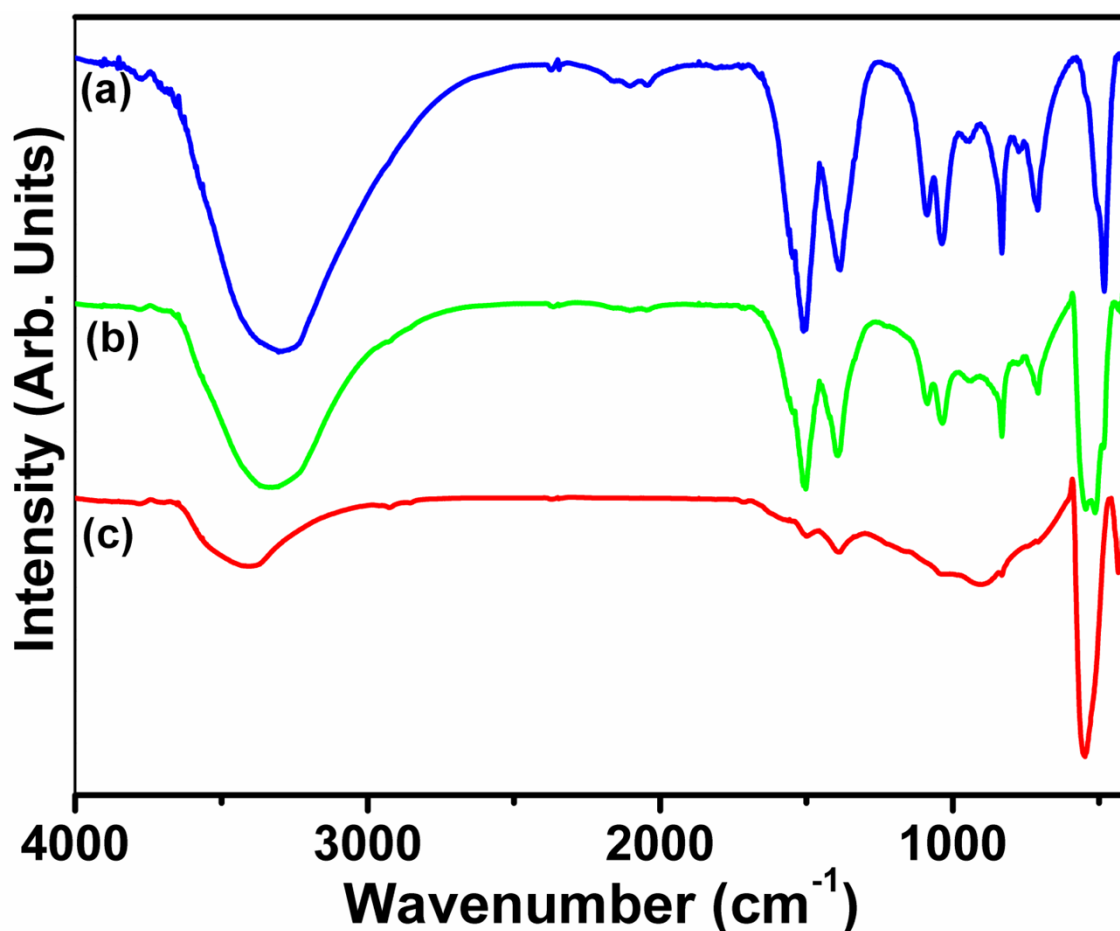

**Figure SI1:** Typical FTIR spectra of as-synthesized zinc based hydroxide/oxide samples, (a) Zn-1; (b) Zn-2; and (c) Zn-3.

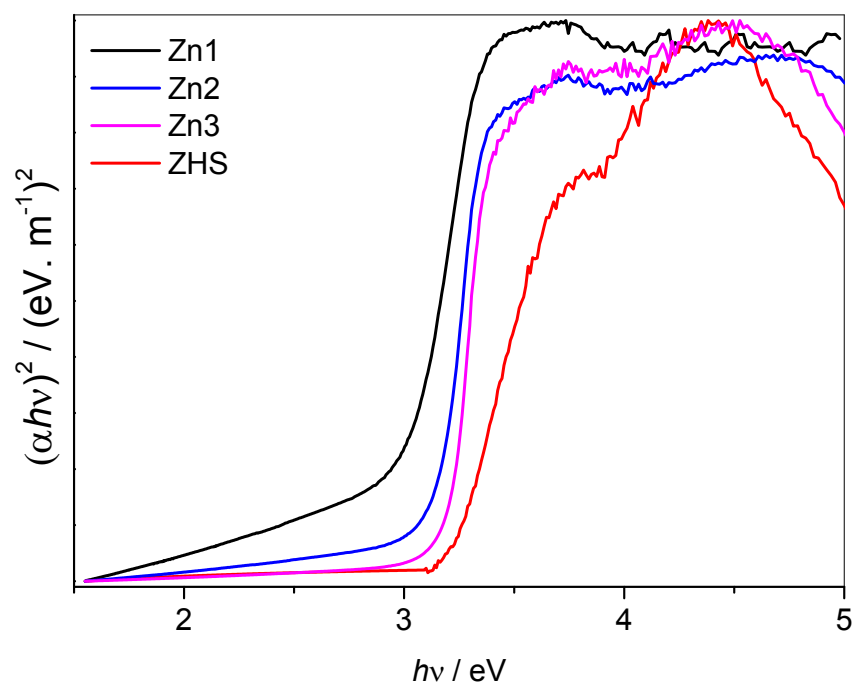

**Figure S12:** Plot of  $(\alpha h\nu)^2$  as a function of  $h\nu$  from the UV-Vis diffuse reflectance curve of as-synthesized samples.
